# Supplementary material
Source: PubMed Central journal article supplement (PMC3932895)
Supplement: 1320123111_pnas.201320123SI.pdf [file 1320123111_pnas.201320123SI.pdf]

# Supporting Information

Hussain and Asgari 10.1073/pnas.1320123111

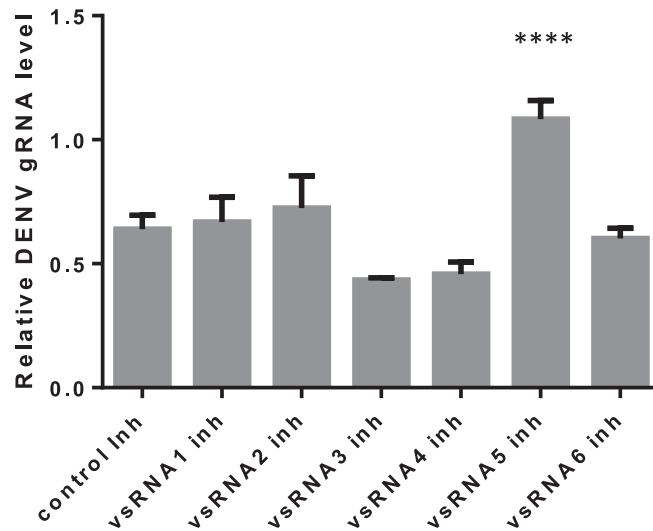

Fig. S1. Quantitative RT-PCR analysis to examine the levels of viral genomic RNA (gRNA) in *Aedes albopictus* RML-12 cells transfected with synthetic inhibitors of the six vsRNAs as shown in Fig. 1A followed by Dengue virus-2 infection at 7 d after infection. Data were normalized against RPS17. \*\*\*\* $P < 0.0001$ , ANOVA.

**Table S1. DENV-2 miRNA-like viral small RNAs (vsRNAs) identified in the 5' and 3'UTRs of the viral genome**

| DENV- vsRNAs | Genomic position | Sequence                     | PremiRNA (RNAfold)                                                      |
|--------------|------------------|------------------------------|-------------------------------------------------------------------------|
| vsRNA-1      | 14–35            | CGUGGACCGACAAAGACAGAUU       | AGUCUACGUGGACCGACAAAGACAGAUUCUUUGAGGGAGC<br>UAAGCUCAACGU                |
| vsRNA -2     | 10697–10723      | AAUGGUGCUGUUGAAUACAACAGGUUCU | UCUCCUCAGCAUCAUCCAGGCACAGAACGCCAGAAAUG<br>GAAUGGUGCUGUUGAAUACAACAGGUUCU |
| vsRNA -3     | 10488–10507      | GUAGUGGACUAGCGGUUAGA         | AUCUGGGAGGCCACAAACCAUGGAAGCUGUACGCAUGGCCGUA<br>GUGGACUAGCGGUUAGAGGAG    |
| vsRNA -4     | 10526–10546      | AAUCGCAGCAACAAUGGGGGC        | AUGGCGUAGUGGACUAGCGGUUAGAGGAGACCCUCCUUACA<br>AAUCGCAGCAACAAUGGGGGC      |
| vsRNA -5     | 10299–10321      | CAGAAGUCAGGUCGGAUUAGCC       | ACAAGGCAGAAGUCAGGUCGGAUUAGCCAUAGUACGGAAAAA<br>CUAUGCACUCCUGUGAGCCC      |
| vsRNA -6     | 10582–10602      | ACUAGAGGUUAGAGGAGACC         | AGGUGAGAUGAAGCUGUAGUCUCACUGGAAGGACUAGAGGUUA<br>GAGGAGACCCCCCA           |

The vsRNA sequences were obtained from deep sequencing of DENV-infected *Aedes aegypti* mosquitoes. Potential sequences forming precursor stem loops (premiRNA) were predicted in RNAfold.
